# Supplementary material for: Real-time, spectral analysis of the arterial pressure waveform using a wirelessly-connected, tablet computer: a pilot study
Source: Springer Nature journal article supplement (doi:10.1007/s10877-018-0145-0), 2018-04-28
Supplement: MOESM5 [file 15727046]

**Supplementary Digital Content:**

| <b>EQUIPMENT:</b>                                                                                                                                 |                                                                                                                                    |
|---------------------------------------------------------------------------------------------------------------------------------------------------|------------------------------------------------------------------------------------------------------------------------------------|
| <b>Transducer system:</b><br>IcuMedical<br>951 Calle Amanecer,<br>San Clemente,<br>CA 92673 USA<br>Reference Number: 011-46104-33                 | <b>Arterial Cannula:</b><br>Arrow International,<br>2400 Bernville Road,<br>Reading,<br>PA 19605 USA<br>Reference Number: RA-04220 |
| <b>RS232 serial adapter:</b><br>Grid Connect, Inc.<br>1630 W. Diehl Road<br>Naperville, Illinois 60563 USA<br>Part Number: GC-BT-FIREFLY-DTE-NOPS |                                                                                                                                    |

**Programming environment:**

The following computing packages were used in the development of the applications:

- Microsoft Visual Studio 15. Release 15.2.0+26430.13
- Microsoft .NET Framework Version 4.7.02556
- Xamarin 4.5.0.486 (fec6f88)
- MathNet.numerics 4.0.0 (beta 07)

The author wrote his own interface to the anaesthesia monitor. However, an open source version can be found at:

- <https://sourceforge.net/projects/vscapture/>

See: Karippacheril JG, Ho TY. Data acquisition from S/5 GE Datex anesthesia monitor using VSCapture: An open source.NET/Mono tool. J Anaesthesiol Clin Pharmacol. 2013 Jul;29(3):423-4.

**Useful Websites:**

| <b>Website:</b>           | <b>URL:</b>                                                                                         | <b>Last Accessed:</b> |
|---------------------------|-----------------------------------------------------------------------------------------------------|-----------------------|
| Microsoft 'Visual Studio' | <a href="https://www.visualstudio.com/">https://www.visualstudio.com/</a>                           | 5 February 2018       |
| Xamarin 'Studio'          | <a href="https://xamarin.com/">https://xamarin.com/</a>                                             | 5 February 2018       |
| MathNet 'Numerics'        | <a href="http://numerics.mathdotnet.com/">http://numerics.mathdotnet.com/</a>                       | 5 February 2018       |
| VS 'Capture'              | <a href="https://sourceforge.net/projects/vscapture">https://sourceforge.net/projects/vscapture</a> | 5 February 2018       |
| Graphpad 'Prism'          | <a href="https://www.graphpad.com/demos">https://www.graphpad.com/demos</a>                         | 24 February 2018      |

**Installing the 'Prism' viewer:**

A fully-functional version of Graphpad 'Prism' is available at the website listed above. 30 days after installation it reverts to 'Viewer' mode (unless a subscription is purchased).

**Sine wave generator:**

The application was initially developed using a series of data files which were created by a purpose-written, composite sine wave generator written in C# and running as a 'Windows Forms' application.

The generator created a simulated arterial trace (with respiratory variability) by summing three sine waves to which was then added a DC bias.

The application initially created a 'primary' (Pulse) wave with an adjustable frequency in the range 1 to 3 Hz and an adjustable amplitude.

In order to simulate 'sinus arrhythmia' or some other cause of a pulse irregularity, the frequency of this primary wave could also be set to be randomly varied by up to +/- 5% at the time of the generation of each wave cycle.

In order to simulate the dicrotic notch, an amplitude-adjustable 'secondary' wave (which was the second harmonic of the primary wave frequency) was added to the primary wave.

Systolic pressure variability was simulated by the addition of a frequency- and amplitude- adjustable tertiary wave.

The frequency range of this wave was 0.12 – 0.2 Hz.

Finally, the effect of changing systemic vascular resistance was simulated by the addition of a variable DC bias to the summed waves.

The generator wrote the data to a file as a sequence of 'Datex-Ohmeda Record' structures.

During development, the application then read these data as 'Datex Ohmeda Records' at a frequency of 1 Hz.

### **Fourier analysis:**

Interested readers will find a facsimile of Fourier's original paper at:

<http://gallica.bnf.fr/ark:/12148/bpt6k33707/f220n7.capture>

### **Installing the application:**

1. Download the file named AisysFFT.msi
2. Double click it
3. Follow the wizard's instructions

**This 'Live' version of the application only works on 'Windows' computers which are either hardwired or 'bluetooth' connected to GE 'AISYS' monitors.**

The application is supplied with two sample raw data files which can be used in 'File' mode and will also work with other 'raw' GE data files.

### **C# snippet for FFT using MathNet package:**

```
void FFTCalculateAsync()
{
    FFTInputArray = DeTrendInputArray(FFTInputArray); //REMOVE DC OFFSET
    Complex[] complexInput = new Complex[FFT_SAMPLE_SIZE];
    double FFTWindow;
    for (int i = 0; i < complexInput.Length; i++)
    {
        FFTWindow = (double)FFTInputArray[i] * FFTWindowFunction[i];
        Complex complexValue = new Complex(FFTWindow, 0);
        complexInput[i] = complexValue;
    }
    MathNet.Numerics.IntegralTransforms.Fourier.Forward(complexInput);
    for (int i = 0; i < complexInput.Length; i++)
    {FFTMagnitudeArray[i] = (int)Complex.Abs(complexInput[i]);}
}
```
